# Supplementary material
Source: HighWire-hosted journal article supplement (https://qdcxjkg.com/highwire/filestream/113485/field_highwire_adjunct_files/0/1108presspack.pdf)
Supplement: 1108presspack.pdf [file 1108presspack.pdf]

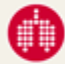

## News Release

21 July 2011

### Breastfeeding may prevent asthma

Feeding a baby on only breast milk and for up to 6 months after birth can reduce their risk of developing asthma-related symptoms in early childhood, according to new research.

The study, which is published online today (21 July 2011) in the *European Respiratory Journal*, looked at the impact of the duration of breastfeeding and the introduction of alternative liquids or solids in addition to breast milk.

The researchers, from the Generation R Study, Erasmus Medical Center in The Netherlands, used questionnaires to gather data from over 5,000 children. They ascertained in the first 12 months after birth whether the children had ever been breastfed, when breastfeeding was stopped, and whether any other milk or solids were introduced.

Further questionnaires were completed when the children were aged 1, 2, 3 and 4 years to check whether they had any asthma-related symptoms.

The results showed that children who had never been breastfed had an increased risk of wheezing, shortness of breath, dry cough and persistent phlegm during their first 4 years, compared to children who were breastfed for more than 6 months.

The strongest links were seen with wheezing and persistent phlegm, as children were 1.4 and 1.5 times more likely to develop these symptoms if they had never been breastfed.

Children who were fed other milk or solids during their first 4 months in addition to breast milk had an increased risk of wheezing, shortness of breath, dry cough and persistent phlegm during the first 4 years, compared to children who were exclusively breastfed for their first 4 months.

While previous studies have shown a similar effect between breastfeeding and asthma risk, this research is the first that showed a link between the length of breastfeeding and the number of wheezing episodes. Also, this study found evidence that the first asthma-related symptoms occur earlier in life if children were breastfed for shorter lengths of time or not exclusively.

Dr Agnes Sonnenschein-van der Voort, researcher at Generation R and lead author from the Erasmus Medical Center in The Netherlands, said: “The link of duration and exclusiveness of breastfeeding with asthma-related symptoms during the first 4 years was independent of infectious and atopic diseases. These results support current health policy strategies that promote exclusive breastfeeding for 6 months in industrialised countries. Further studies are needed to explore the protective effect of breastfeeding on the various types of asthma in later life.”

**Notes to editors:**

**Title:** Duration and exclusiveness of breastfeeding and childhood asthma-related symptoms

**Authors:** Agnes M.M. Sonnenschein-van der Voort, Vincent W.V. Jaddoe, Ralf J.P. van der Valk, Sten P. Willemsen, Albert Hofman, Henriëtte A. Moll, Johan C. de Jongste, Liesbeth Duijts.

**DOI:** 10.1183/09031936.00178110

To view the paper online (subscription required), please visit:

<http://erj.ersjournals.com/content/early/recent>

For further information and comment, please contact: Ceciel van Hemel

Press Officer, Erasmus MC. Tel: +31 (0)10 703 52 85 or email:

[c.vanhemel@erasmusmc.nl](mailto:c.vanhemel@erasmusmc.nl)

To access the full paper, please contact: Lauren Anderson, European Lung

Foundation, [lauren.anderson@europeanlung.org](mailto:lauren.anderson@europeanlung.org)

NR/ends
